# Supplementary material for: Dental pulp-derived stem cell conditioned medium reduces cardiac injury following ischemia-reperfusion
Source: PubMed Central journal article supplement (PMC4635346; doi:10.1038/srep16295), 2015-11-06
Supplement: srep16295-s1.pdf [file srep16295-s1.pdf]

## **Supplementary Information**

### **Dental pulp-derived stem cell conditioned medium reduces cardiac injury following ischemia-reperfusion**

Satoshi Yamaguchi, DDS<sup>1</sup>, Rei Shibata, MD, PhD<sup>2</sup>, Noriyuki Yamamoto, DDS, PhD<sup>1</sup>, Masaya Nishikawa, DDS, PhD<sup>1</sup>, Hideharu Hibi DDS, PhD<sup>1</sup>, Tohru Tanigawa, MD, PhD<sup>3</sup>, Minoru Ueda, DDS, PhD<sup>1</sup>, Toyooki Murohara, MD, PhD<sup>2</sup> and Akihito Yamamoto, DDS, PhD<sup>1</sup>

<sup>1</sup>Department of Oral and Maxillofacial Surgery, Nagoya University Graduate School of Medicine, Nagoya, Japan

<sup>2</sup>Department of Cardiology, Nagoya University Graduate School of Medicine, Nagoya, Japan

<sup>3</sup>Department of Otolaryngology, Aichi Medical University, Nagakute, Japan

## Figure 2c

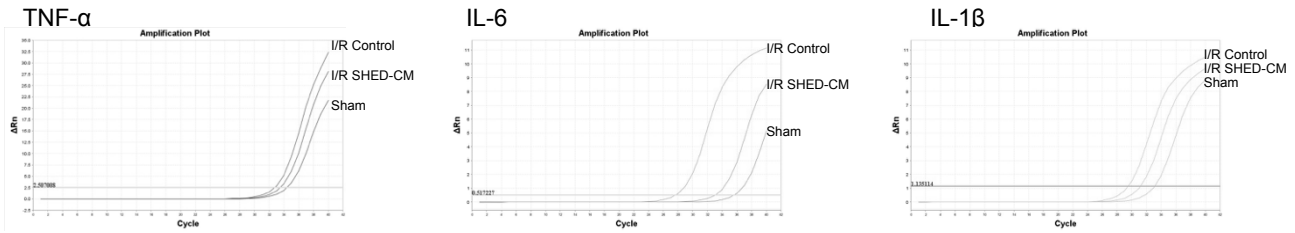

## Figure 3d

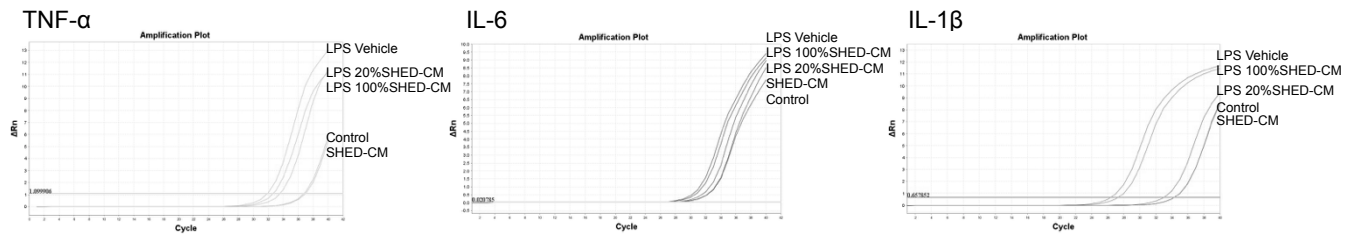

## Figure 4c

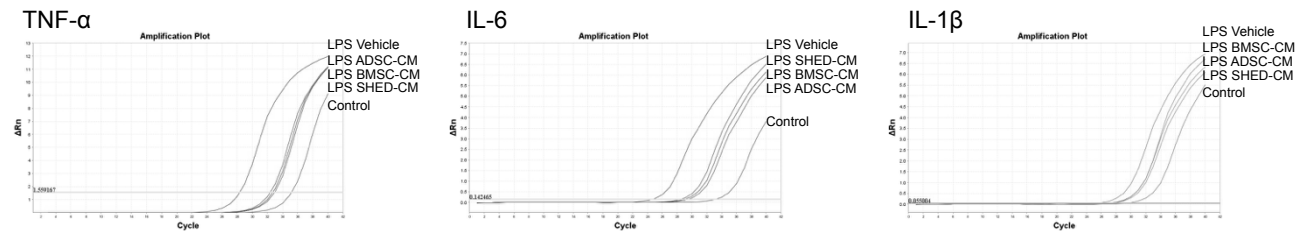

## Figure 5e

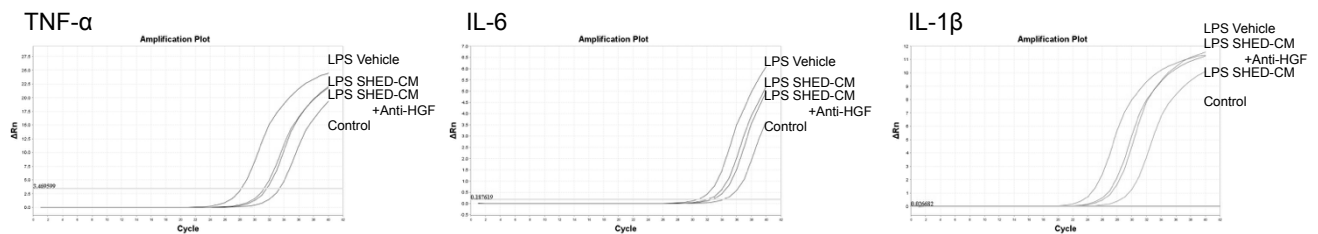

**Supplemental Figure 1:** Representative amplification curves in Figure 2C, Figure 3D, Figure 4C and Figure 5E.

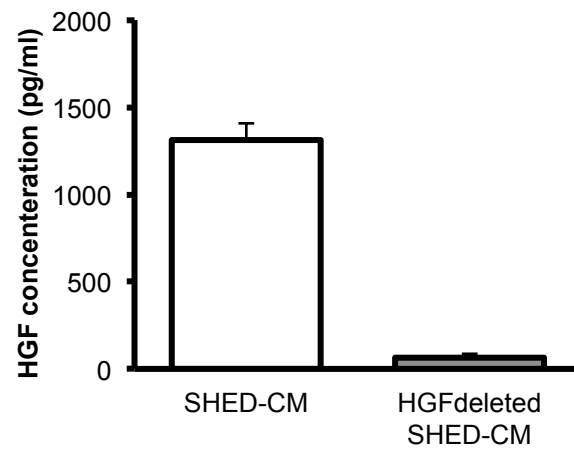

**Supplemental Figure 2.** Quantitative analysis of HGF concentrations in SHED-CM or HGF-depleted SHED-CM. HGF levels in conditioned media were quantified with the Quantikine ELISA Human HGF Immunoassay kit.

**Used primers for quantitative PCR**

| Mouse Primers |         | Sequence                        |
|---------------|---------|---------------------------------|
| TNF- $\alpha$ | forward | 5'-CCCTTTACTCTGACCCCTTTATTGT-3' |
|               | reverse | 5'-TGTCCCAGCATCTTGTGTTTCT-3'    |
| IL-6          | forward | 5'-CCAAGAACGATAGTCAATTCCAGA-3'  |
|               | reverse | 5'-CATCAGTCCCAAGAAGGCAAC-3'     |
| IL-1 $\beta$  | forward | 5'-CAGGATGAGGACCCAAGCAC-3'      |
|               | reverse | 5'-TCAGACAGCACGAGGCATTT-3'      |
| GAPDH         | forward | 5'-AACTTTGGCATTGTGGAAGGT-3'     |
|               | reverse | 5'-GGATGCAGGGATGATGTTCT-3'      |

  

| Rat Primers   |         | Sequence                      |
|---------------|---------|-------------------------------|
| TNF- $\alpha$ | forward | 5'-CTCGAGTGACAAGCCCGTAG-3'    |
|               | reverse | 5'-CCTTGAAGAGAACCTGGGAGTAG-3' |
| IL-6          | forward | 5'-TTGCCTTCTTGGGACTGATG-3'    |
|               | reverse | 5'-ACTGGACTGTTGTGGGTGGT-3'    |
| IL-1 $\beta$  | forward | 5'-CAGGATGAGGACCCAAGCAC-3'    |
|               | reverse | 5'-TCAGACAGCACGAGGCATTT-3'    |
| GAPDH         | forward | 5'-AACTTTGGCATCGTGGAAGG-3'    |
|               | reverse | 5'-CGGATACATTGGGGGTAGGA-3'    |
